# Supplementary material
Source: publisher figshare collection journal article supplement (https://gsajournals.figshare.com/ndownloader/files/29052270)
Supplement: Supplementary file 1 [file 29052270]

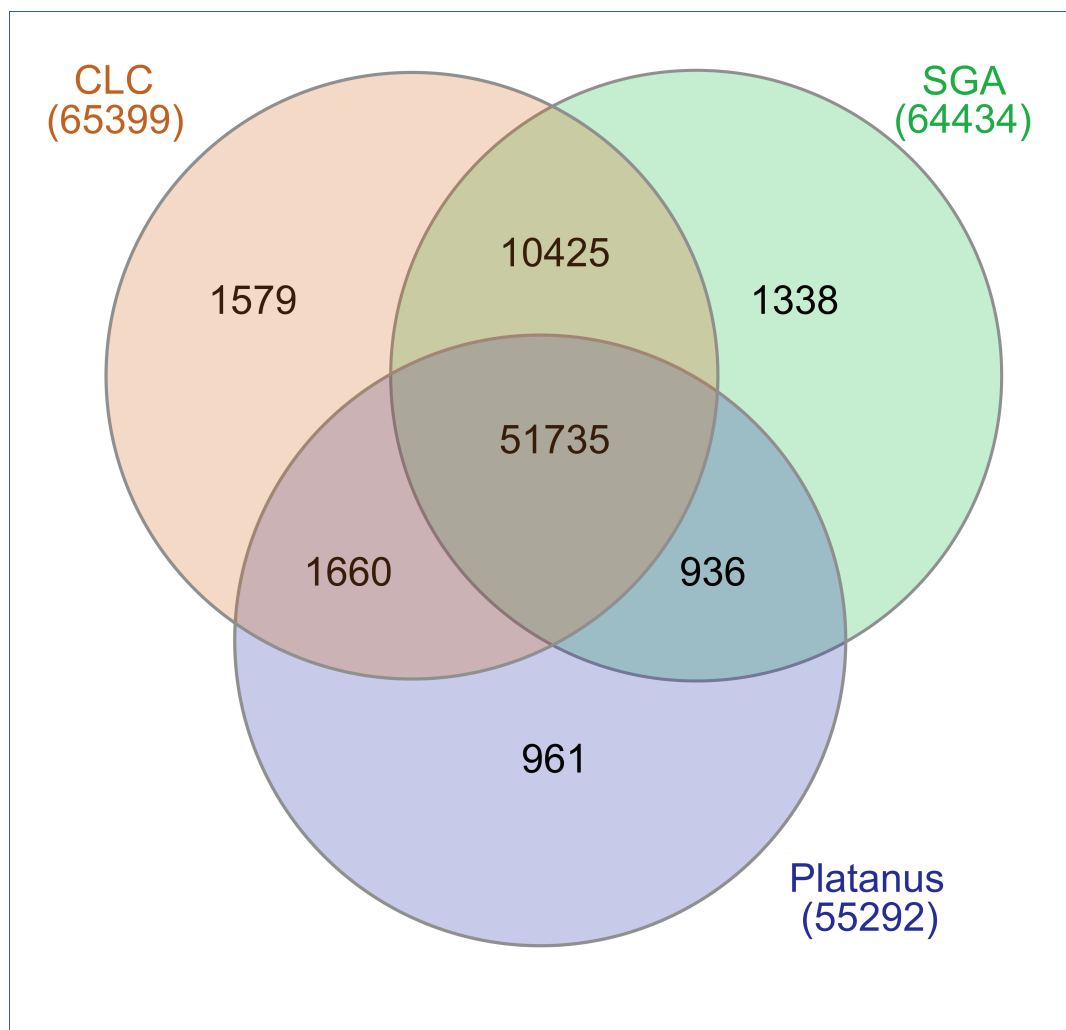

**Figure S3. Representation of *B. v. variegata* transcripts in the three genome assemblies.** The *B. v. variegata* reference transcriptome (Nürnberg et al. 2016) comprises 73,079 transcripts. Shown here are the counts of transcripts with BLAST+ matches ( $\geq 98\%$  sequence identity) in each of the genome assemblies. The total number of matched transcripts is given in parentheses for each assembly.
